# Supplementary figures and images for: Acute exposure to apolipoprotein A1 inhibits macrophage chemotaxis in vitro and monocyte recruitment in vivo
Source: eLife journal article supplement (doi:10.7554/elife.15190), 2016-08-30

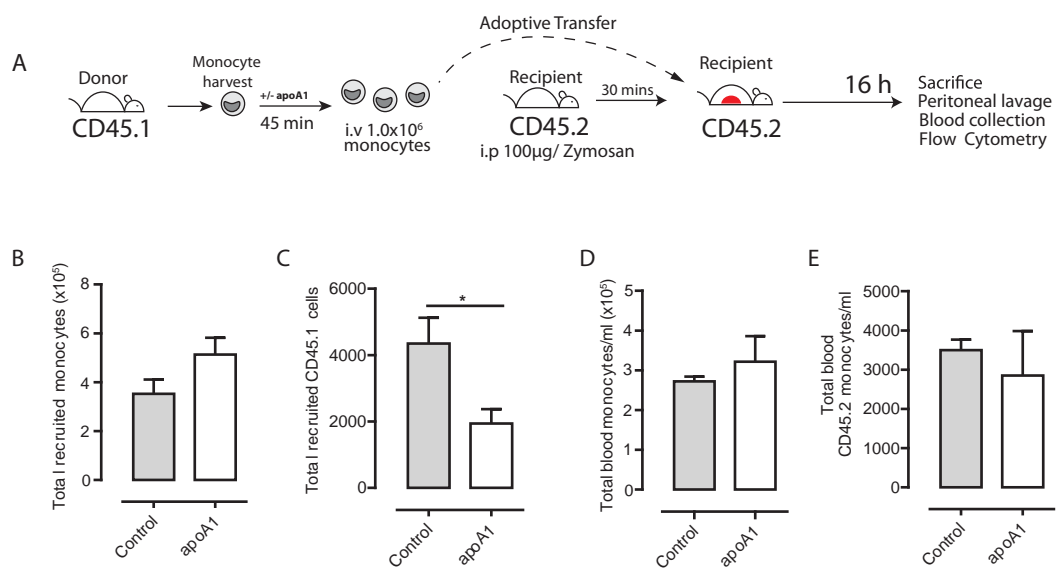

Figure 4- figure supplement 1

Supplement: supp [file elife-15190-supp-v1.zip]

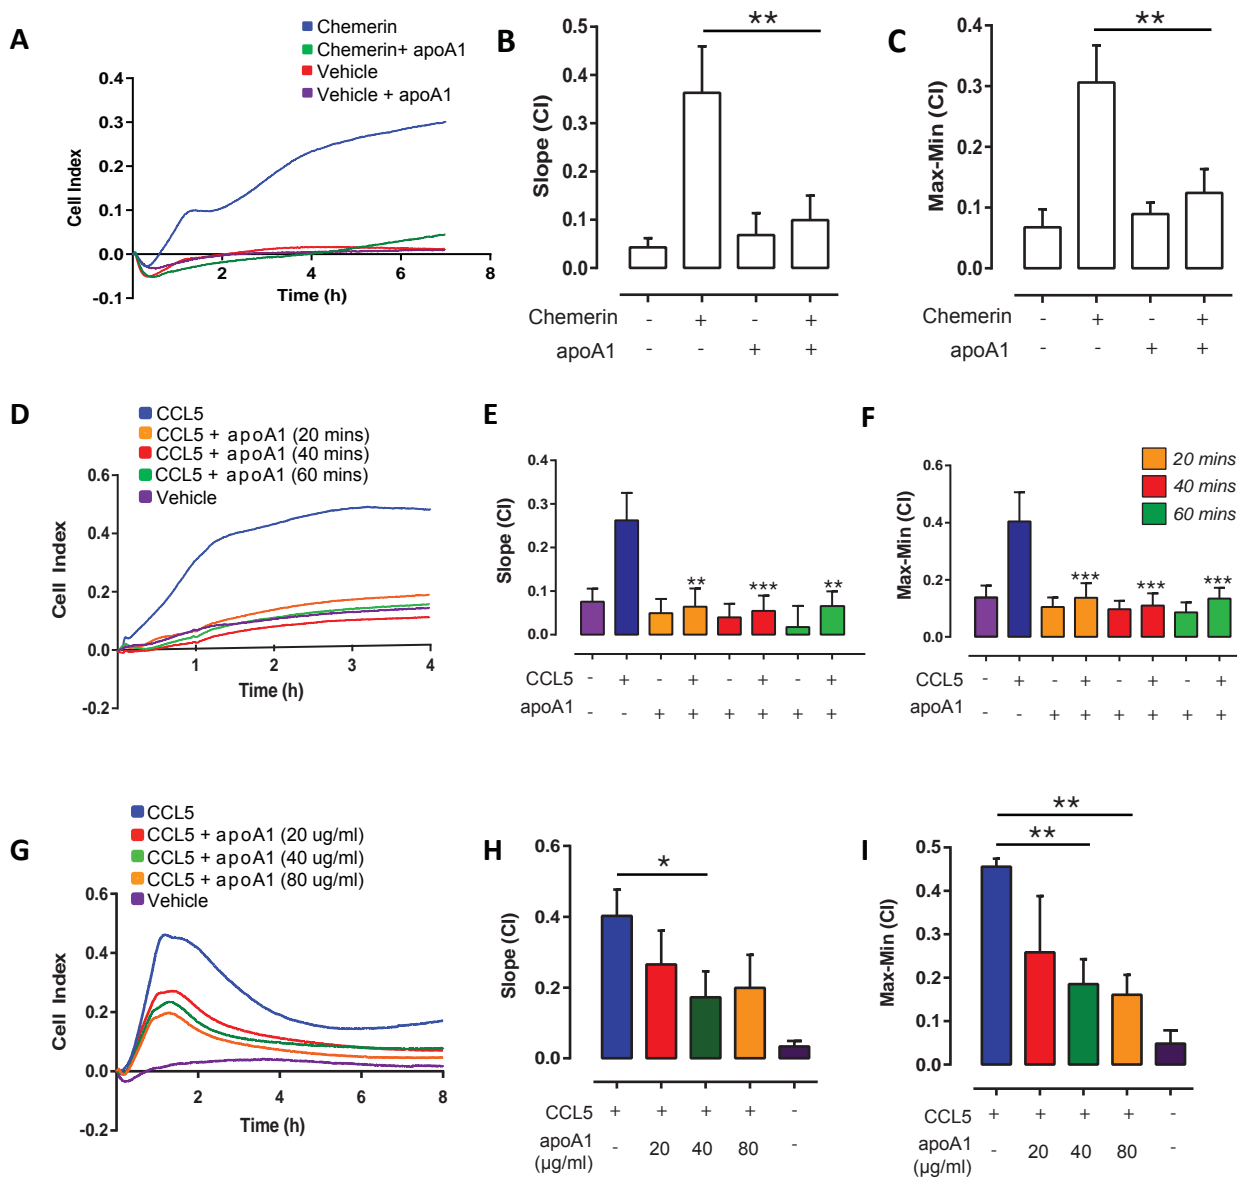

Figure 1- figure supplement 1

Supplement: supp [file elife-15190-supp-v1.zip]

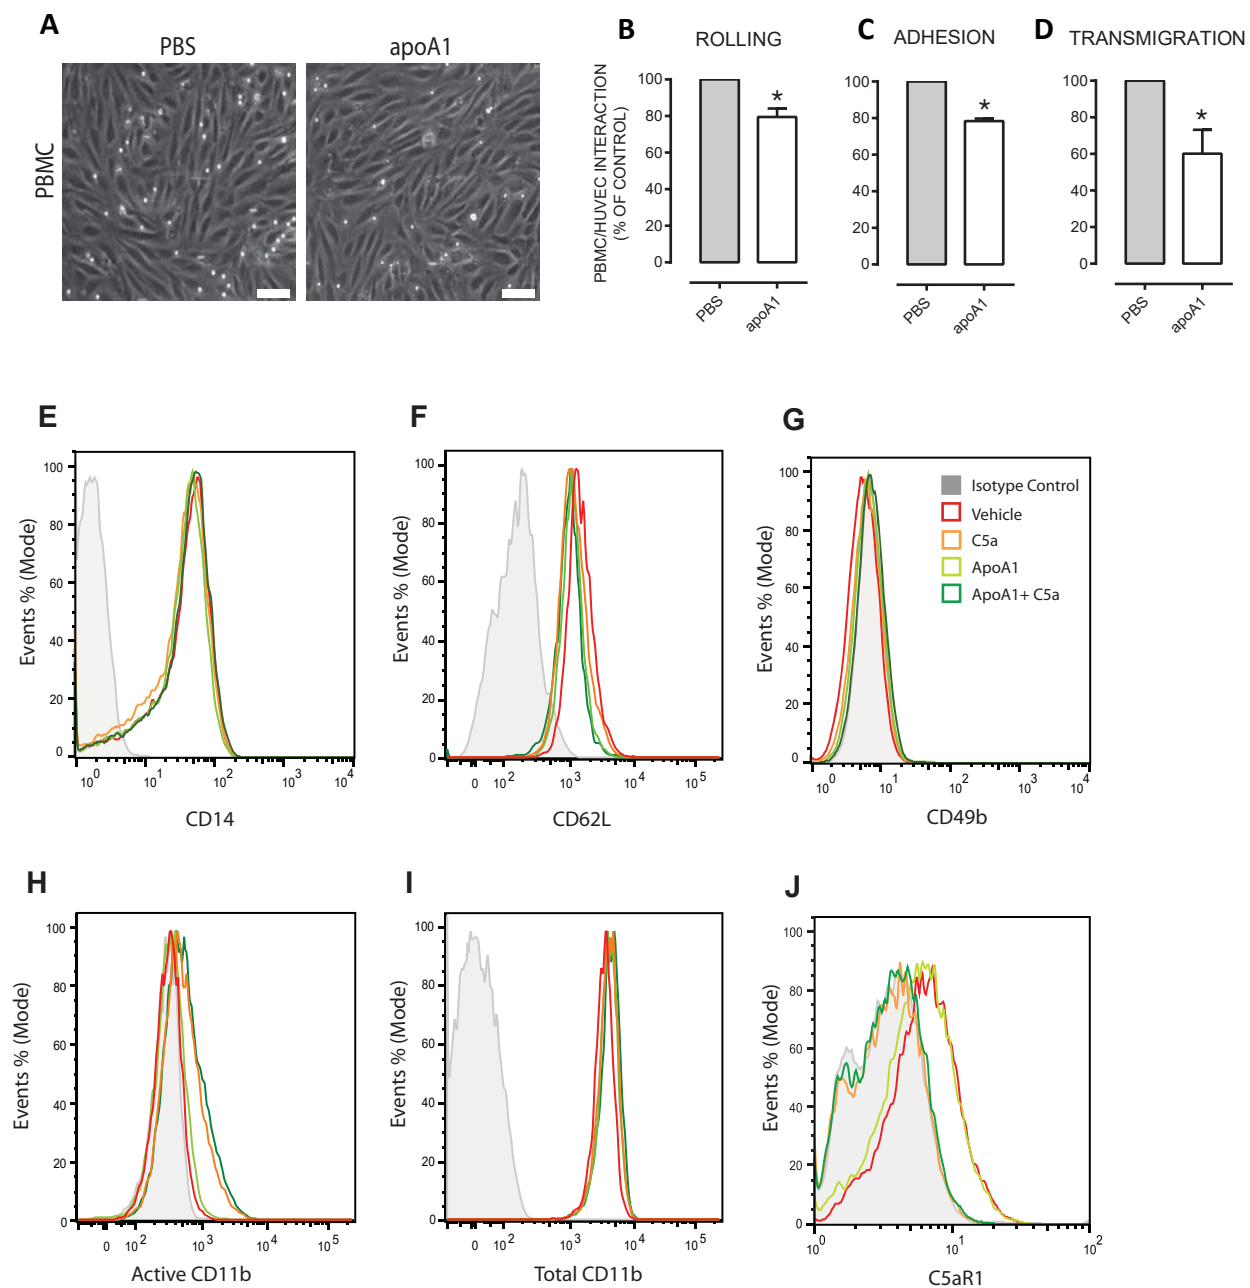

Figure 3- figure supplement 1

Supplement: supp [file elife-15190-supp-v1.zip]

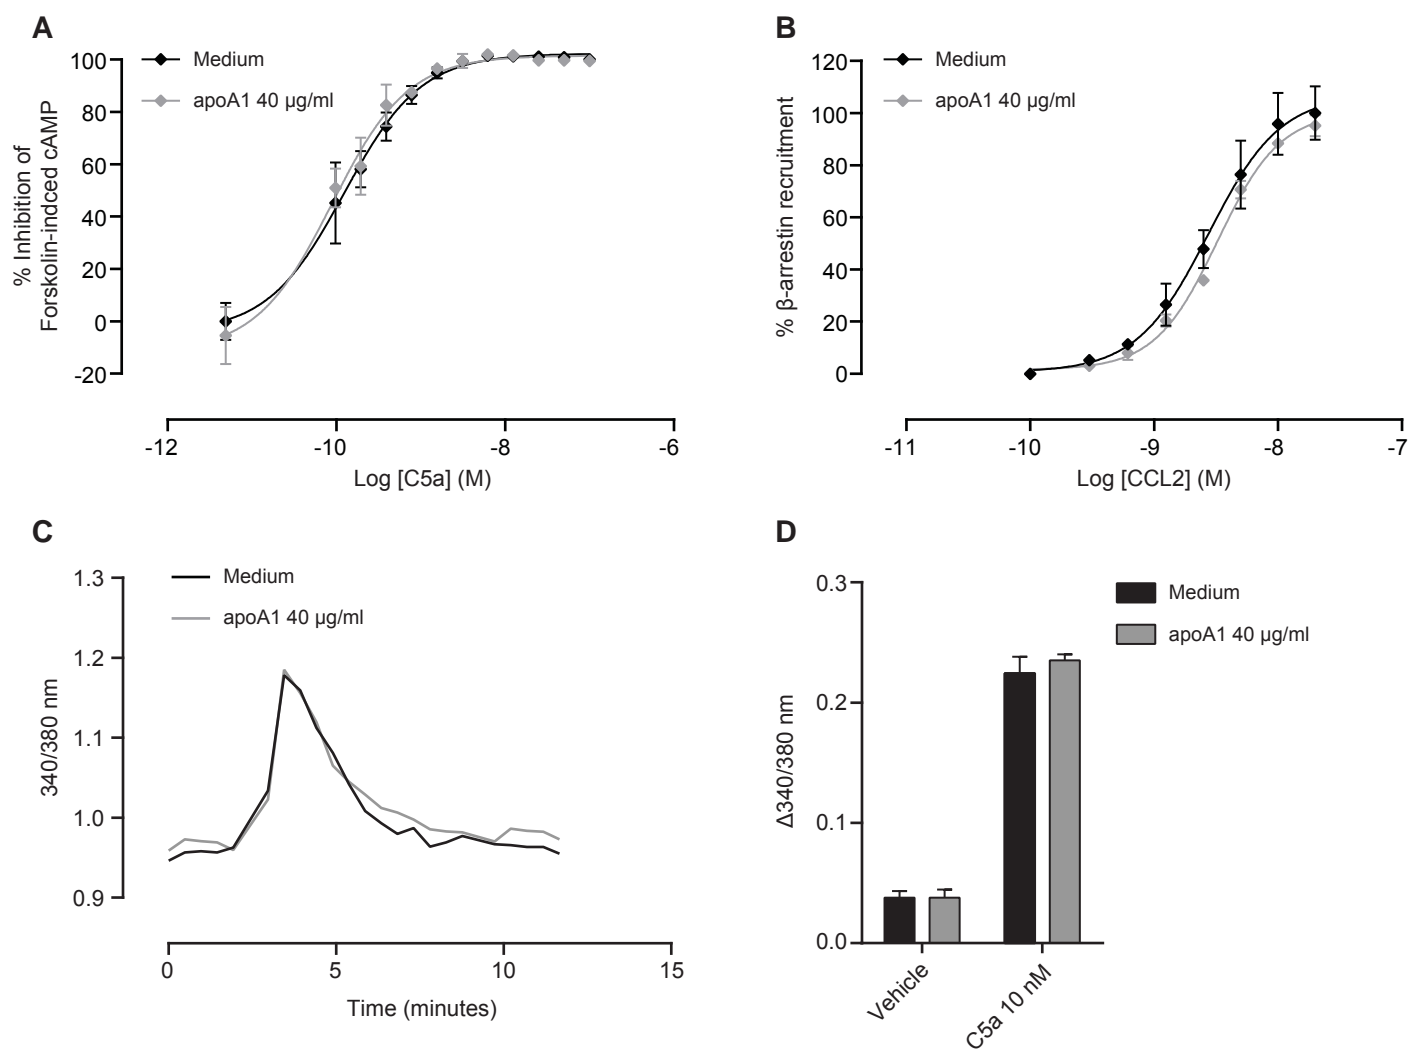

Figure 6- figure supplement 1

Supplement: supp [file elife-15190-supp-v1.zip]

**A**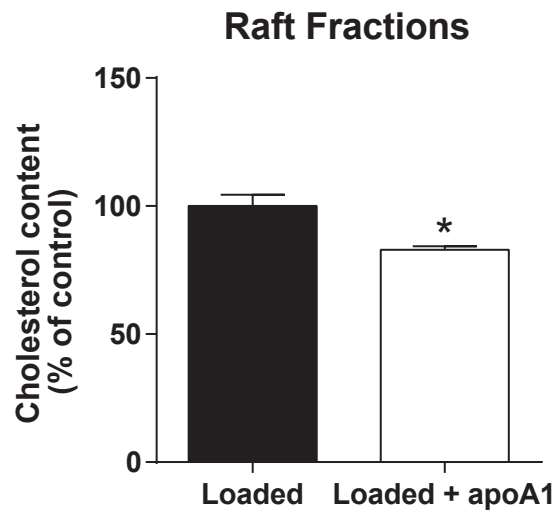**B**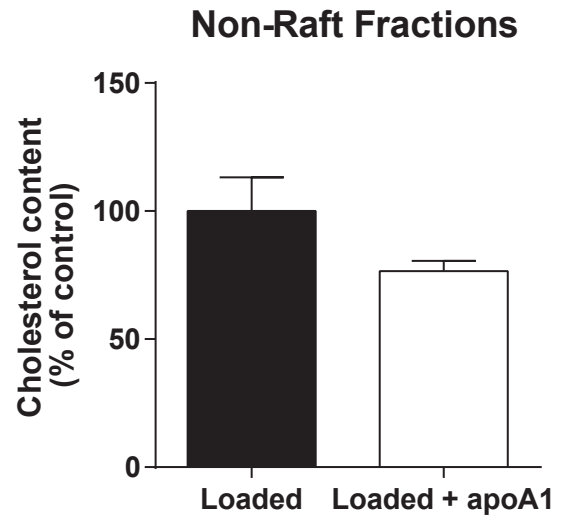

Figure 7- figure supplement 1

Supplement: supp [file elife-15190-supp-v1.zip]
